Table S1. The amount of paraffin oil and substance (in  $\mu\text{l}$ ) used to standardize the stimuli according to their volatility; this ensured all stimuli had the same vapour pressure during the experiment

| Substance  | Vapour pressure (mmHg) | 1/Vapour pressure | Substance ( $\mu\text{l}$ ) | Paraffin oil ( $\mu\text{l}$ ) |
|------------|------------------------|-------------------|-----------------------------|--------------------------------|
| 1-Hexanol  | 0.928                  | 1.078             | 10.776                      | 989.224                        |
| 1-Octanol  | 0.0794                 | 12.594            | 125.945                     | 874.055                        |
| Octanal    | 1.18                   | 0.847             | 8.475                       | 991.525                        |
| 2-Octanone | 1.35                   | 0.741             | 7.407                       | 992.593                        |
| Hexanal    | 11.3                   | 0.088             | 0.885                       | 999.115                        |
| 2-Hexanone | 11.6                   | 0.086             | 0.862                       | 999.138                        |
